# Supplementary material for: Fabrication and emulsifying properties of non-covalent complexes between soy protein isolate fibrils and soy soluble polysaccharides
Source: Royal Society of Chemistry journal article supplement (doi:10.1039/d1fo01604k), 2021-10-03
Supplement: d1fo01604k1.pdf [file d1fo01604k1.pdf]

## Supplements

**Table S1.** Quantification estimation of the secondary structure of SPIF and SPIF/SSPS complex with different SPIF and SSPS ratio.

| Samples | $\alpha$ -helix/% | $\beta$ -sheet/% | $\beta$ -turn/% | random coil/% |
|---------|-------------------|------------------|-----------------|---------------|
| SPIF    | 0                 | 66.72            | 31.59           | 1.69          |
| 5:1     | 5.33              | 66.65            | 25.38           | 2.64          |
| 5:2     | 7.04              | 64.11            | 26.06           | 2.79          |
| 5:3     | 8.46              | 64.13            | 26.40           | 1.01          |
| 5:4     | 8.35              | 63.81            | 26.07           | 1.77          |
| 5:5     | 9.82              | 60.41            | 26.80           | 2.97          |

Secondary structure was deconvolved from amide bands I (1700-1600  $\text{cm}^{-1}$ ).  $\alpha$ -helix (1648-1664  $\text{cm}^{-1}$ ),  $\beta$ -sheet (1615-1637  $\text{cm}^{-1}$ , 1682-1770  $\text{cm}^{-1}$ ),  $\beta$ -turn (1664-1681  $\text{cm}^{-1}$ ) and random coil (1637-1648  $\text{cm}^{-1}$ ).

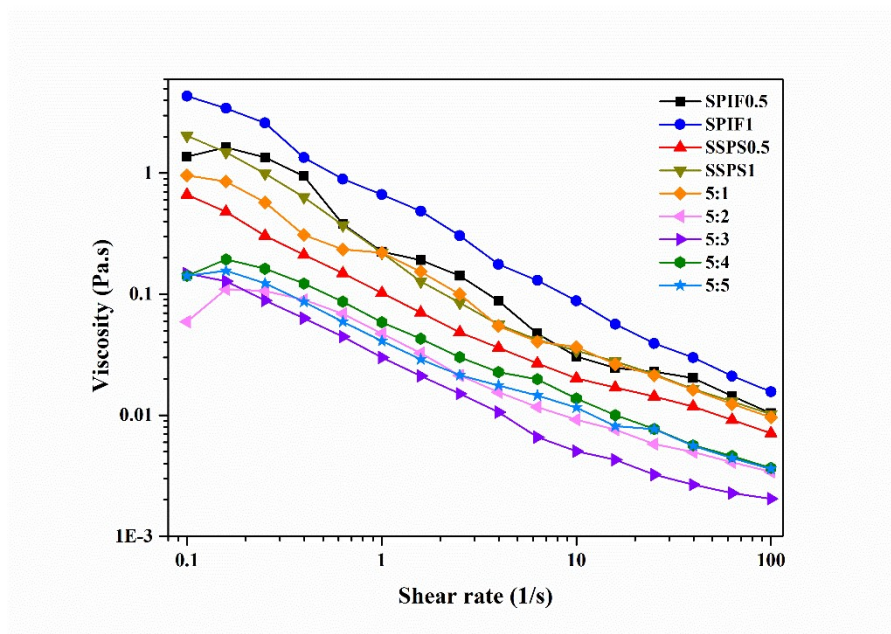

**Figure S1.** Apparent viscosity of emulsions stabilized by SPIF, SSPS and SPIF/SSPS complexes.
